# Supplementary material for: Non-mercury catalytic acetylene hydrochlorination over a NH4F–urea-modified Pd/HY catalyst for vinyl chloride monomer production
Source: Royal Society of Chemistry journal article supplement (doi:10.1039/c5nj03338a), 2016-01-01
Supplement: c5nj03338a1.pdf [file c5nj03338a1.pdf]

**Supplementary Information for:**

**Non-mercury catalytic acetylene hydrochlorination over the  $\text{NH}_4\text{F}$ -  
Urea-modified Pd/HY catalyst for vinyl chloride monomer  
production**

Lu Wang<sup>a</sup>, Feng Wang<sup>a\*</sup>, Jide Wang<sup>a</sup>

<sup>a</sup>Key Laboratory of Oil and Gas Fine Chemicals, Ministry of Education  
and Xinjiang Uyghur Autonomous Region, College of Chemistry and  
Chemical Engineering, Xinjiang University, Urumqi, Xinjiang 830046,  
People's Republic of China

**\*Corresponding author**

E-mail: [wangfeng62@126.com](mailto:wangfeng62@126.com) (F. Wang).

Tel.: +86-0991-8586079; Fax: +86-0991-8582809.

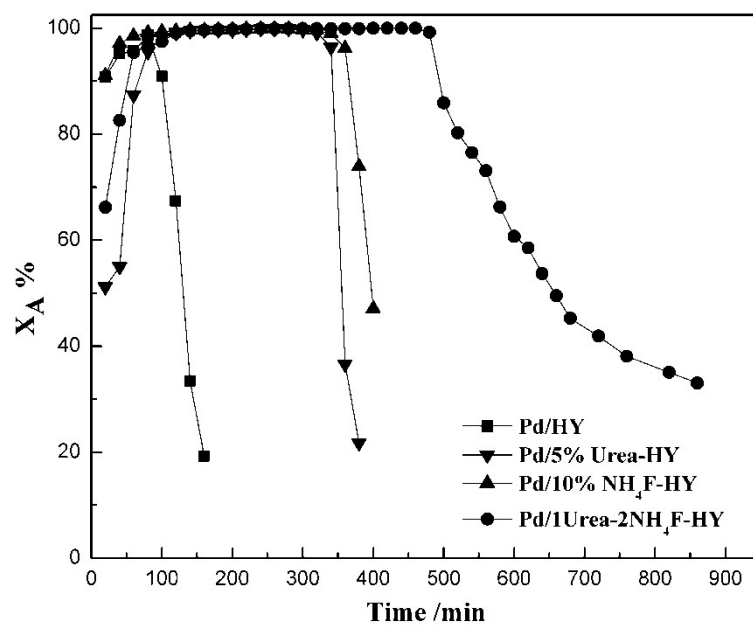

**Fig. S1.** The  $\text{C}_2\text{H}_2$  conversion (a) and selectivity to VCM (b) over Pd-based catalysts; Reaction condition: Temperature = 160 °C, feed volume ratio  $V_{\text{HCl}}:V_{\text{C}_2\text{H}_2} = 1.25$ ,  $\text{C}_2\text{H}_2$  GHSV = 110  $\text{h}^{-1}$ .

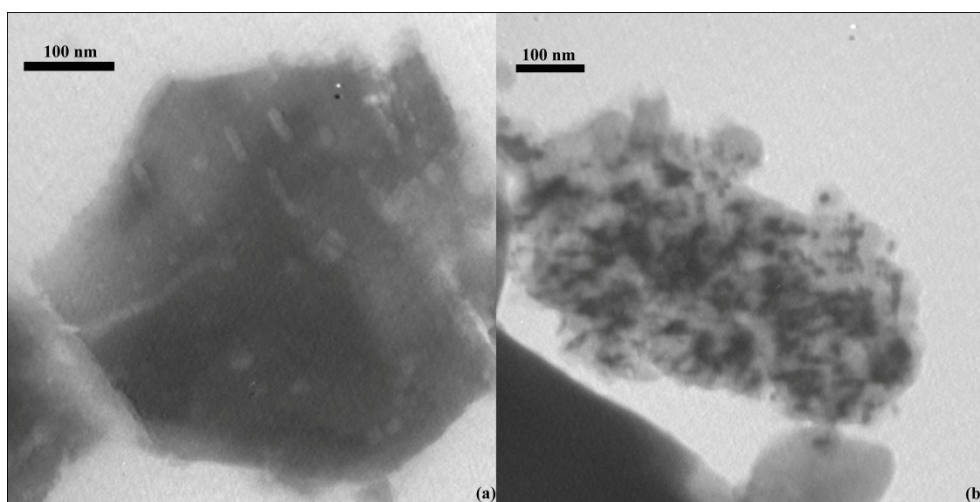

**Fig. S2.** The TEM images of fresh Pd/ HY (a) and Pd/NH<sub>4</sub>F-Urea-HY (b).

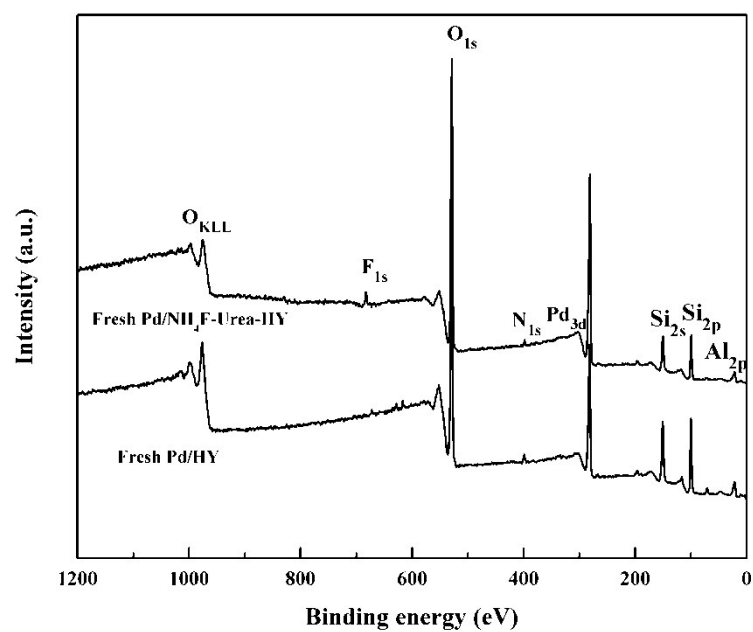

**Fig. S3.** Wide scan spectra of XPS in fresh Pd/HY and Pd/NH<sub>4</sub>F-Urea-HY catalyst.

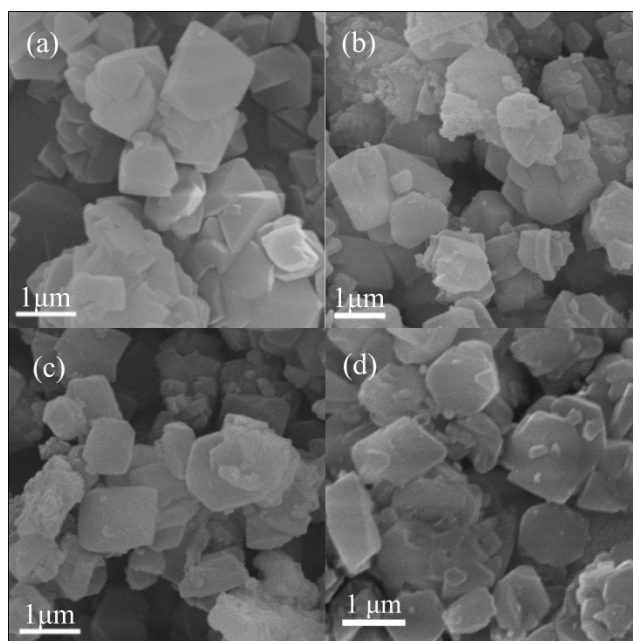

**Fig. S4.** The SEM images of HY (a), the  $\text{NH}_4\text{F}$ -Urea-HY (b), the fresh Pd/ $\text{NH}_4\text{F}$ -Urea-HY (c) and the used Pd/ $\text{NH}_4\text{F}$ -Urea-HY (d).
